# Supplementary material for: Modulation of cellular transcriptome and proteome composition by azidohomoalanine—implications on click chemistry–based secretome analysis
Source: PubMed Central journal article supplement (PMC10300158; doi:10.1007/s00109-023-02333-4), 2023-05-26

# Supplementary Information S11

a

MC38  
521 secreted proteins

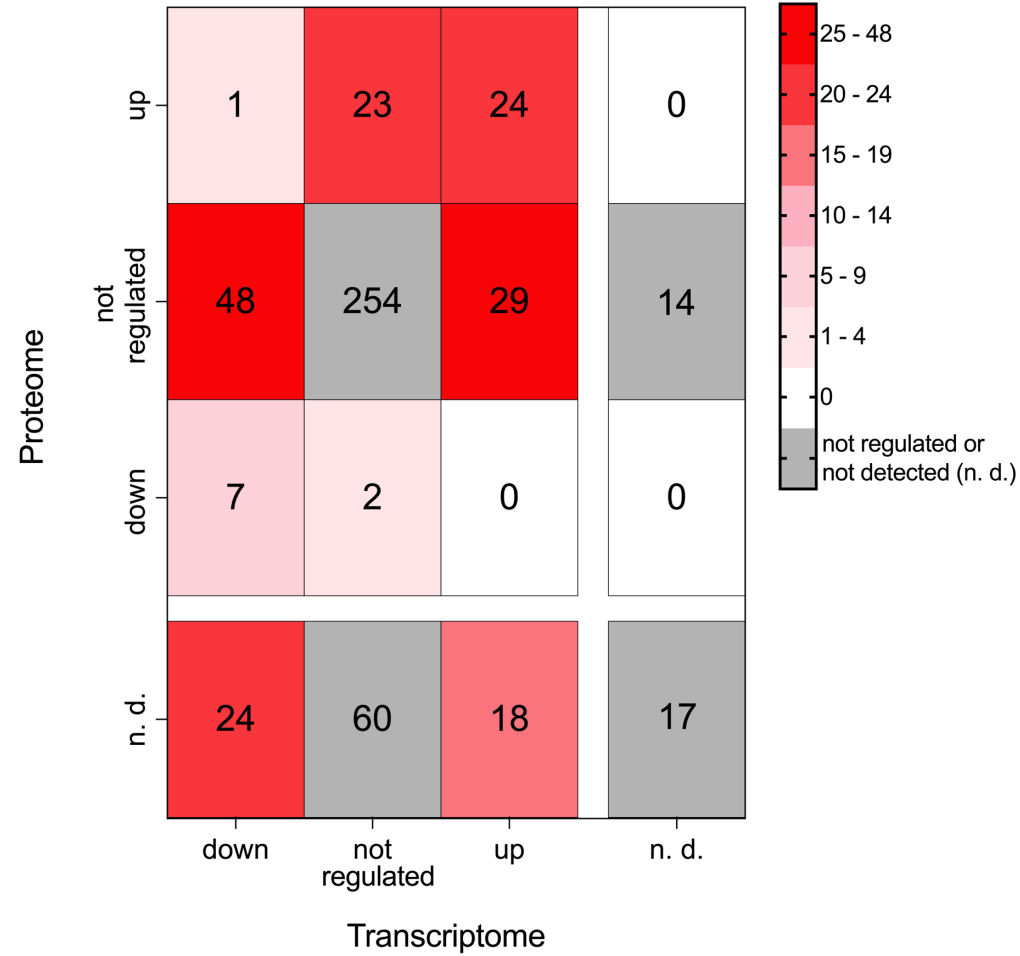

b

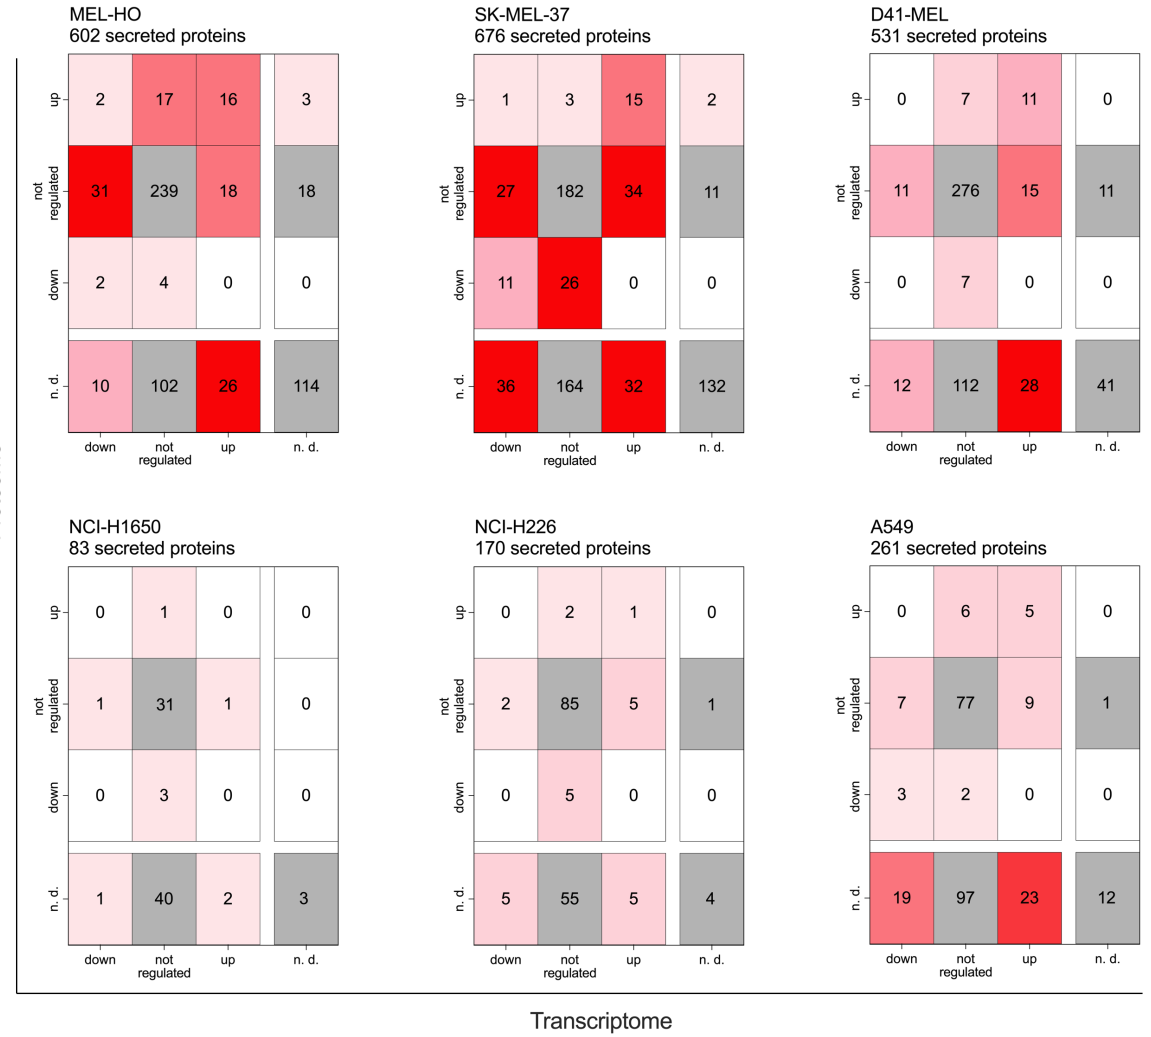

Supplement: 109_2023_2333_MOESM1_ESM.pdf [file 109_2023_2333_MOESM1_ESM.pdf]
